# Supplementary material for: FRCaMP, a Red Fluorescent Genetically Encoded Calcium Indicator Based on Calmodulin from Schizosaccharomyces Pombe Fungus
Source: PubMed Central journal article supplement (PMC7794825; doi:10.3390/ijms22010111), 2020-12-24
Supplement: ijms-22-00111-s001.pdf [file ijms-22-00111-s001.pdf]

# FRCaMP, Red Fluorescent Genetically Encoded Calcium Indicator Based on Calmodulin from *Schizosaccharomyces Pombe* Fungus

Oksana M. Subach, Natalia V. Barykina, Elizaveta S. Chefanova, Anna V. Vlaskina, Vladimir P. Sotskov, Olga I. Ivashkina, Konstantin V. Anokhin, and Fedor V. Subach

## Supplementary Tables and Figures

|           |    |
|-----------|----|
| Table S1  | 2  |
| Table S2  | 3  |
| Figure S1 | 4  |
| Figure S2 | 5  |
| Figure S3 | 6  |
| Figure S4 | 7  |
| Figure S5 | 8  |
| Figure S6 | 9  |
| Figure S7 | 10 |

**Table S1. List of primers.**

| <b>Primer</b>          | <b>Primer sequence (5'-3')</b>                                  |
|------------------------|-----------------------------------------------------------------|
| <b>RSP-BglII</b>       | CTGAGATCTATGAGGAAACCGTCCCGTG                                    |
| <b>CaMSP-HindIII-r</b> | CCAAGCTTCTACTTGGAAGAAATGACACGAGAGAATTC                          |
| <b>MSP-3-5</b>         | ggtAGATCTatgAGAAAAnnsnnsACTGCCTATAACGCTGTAC                     |
| <b>MSP-6-8</b>         | ggtAGATCTatgAGAAAACGTTCCGTnnsnnsAACGCTGTACGTGCTTTC              |
| <b>MSP-9-11</b>        | ggtAGATCTatgAGAAAACGTTCCGTACTGCCTATnnsnnsCGTGCTTTC<br>AACACTTGG |
| <b>dRSP-BglII2</b>     | cgagatctGTGCCGCGGGTTTCCGAG                                      |
| <b>BamHI-bJun</b>      | TGGgatccgccaccatggTGAAGGCGGAGAGGAAGCGCATG                       |
| <b>bJun-NheI-r</b>     | CAGgctagcGGTGGCGATGGATCTTCTAG                                   |
| <b>NheI-RSPC</b>       | ACCgctagcCTGGTAAGCAAGGGCGAGG                                    |
| <b>BamHI-bFos</b>      | TGGgatccgccaccatggTGGGTCGTGCGCAGTCCATCGG                        |
| <b>bFos-NheI-r</b>     | CATgctagcGTGGTTCATGACTTTCTG                                     |
| <b>NheI-RSPN</b>       | CACgctagcATGAGGAAACCGTCCCGTG                                    |
| <b>RSPN-HindIII-r</b>  | GATaagcttCTACTTGTACAGCGCGTCCCGTG                                |

**Table S2. In vitro  $\Delta F/F$  response of truncated versions (with deleted M13-like peptide) of the purified FRCaM and GCaM6s indicators to the saturating calcium ion concentrations.**

| Indicator     | $\Delta F/F$                    |                                  |                                   |
|---------------|---------------------------------|----------------------------------|-----------------------------------|
|               | 0-39 $\mu\text{M}$ <sup>a</sup> | 0-820 $\mu\text{M}$ <sup>a</sup> | 0-2000 $\mu\text{M}$ <sup>a</sup> |
| <b>FRCaM</b>  | 0.17 $\pm$ 0.03                 | 0.00 $\pm$ 0.04                  | 0.04 $\pm$ 0.01                   |
| <b>GCaM6s</b> | 0.16 $\pm$ 0.03                 | 0.18 $\pm$ 0.02                  | 0.05 $\pm$ 0.03                   |

<sup>a</sup> 39, 820, and 2000  $\mu\text{M}$  free calcium concentration corresponds to the 30 mM MOPS, 100 mM KCl, pH 7.20 buffer supplemented with either 10 mM CaEGTA, or 10 mM CaNTA or 2 mM CaCl<sub>2</sub>, respectively. 0 free calcium concentration corresponds to the 30 mM MOPS, 100 mM KCl, pH 7.20 buffer supplemented with either 10 mM EGTA, or 10 mM NTA or 0 mM CaCl<sub>2</sub>, respectively. Data were averaged across 8 repeats. SD is shown.

**NES-FRCaMP-stop gene:**

ATGCTTCAACTTCCTCCTCTTGAACGTCTTACTCTTTTCGAGATCTATGAGGAAACCGTTCGGTGGC  
GCGGGCAACGCTGTGCGTGCTTTCAGCACTTGGAAAAAGCTAGTGCCGCGGGTTTCCGAGTGGAT  
GTACCCCGAGGACGGCGCCCTGAAGAGCGAGATCAGGAAGGGGCTGAGGCTGAAGGACGGCGG  
CCACTACGCCGCCGAGGTCAAGACCACCTACAAGGCCAAGAAGCCCGTGCAGCTGCCCGGGCGC  
CTACATCGTCGACATCGAGTTGGACATCTTGTCCACAACGAGGACTACACCATCGTGGAACAGT  
GCGAACGCGCCGTGGGCCGCCACCCACCGGTGGCACGGACGCGCTGTACAAGGGAGGTACAG  
GCTCCGGCGGGAGTCTGGTAAGCAAGGGCGAGGAGGATAACATGGCCATCATCAAGGAGTTCAT  
GCGCTTCAAGGTGCACATGGAGGGTCCGTGAACGGCCACGAGTTCGAGATCGAGGGCGAGGG  
CGAGGGGCCGCCCTACGAGGCCTTCCAGACCGCTAGGCTGAAGGTGACCAAGGGTGGCCCCCTG  
CCCTTCGCCTGGGACATCCTGTCCCTCAGTTCATGTACGGCTCCAAGGCCTACATTAAGCACCC  
AGCCGACATCCCCGACTACTTCAAGCTGTCCTTCCCCGAGGGCTTCAGGTGGGAGCGCGTGATGA  
GCTTCGAGGACGGCGGCATTATTCACGTTAATCAGGACTCCTCCCTGCAGGACGGCGTATTCATC  
TACAAGGTGAAGCTGCTCGGCACCAACTTCCCCCGACGGCCCCGTAATGCAGAAAGAGACCA  
TGGGCTGGGAGGCTTCCTACGAGATGACTACCCGTAACCTTACAGATGAGCAGATTGCGGAGTTC  
CGTGAGGCCTTTTCGCTGCTTGATCGTGATCAGGATGGAAATATCACGTCCAATGAATTGGGTGT  
GGTTATGAGGTCGTTAGGTCTATCGCCTACTGCCGCCGAATTACAAGATATGATTAATGAGGTCG  
ATGCCGATGGTAATGGCACAATTGATTTTACCGAATTTTTGACAATGATGGCCCCGAAAATGAAG  
GATACCGACGACGAAGAGGAAGTTCGCGAAGCCTTAAAGTCTTCGATAAAGATGGAAGTGGAT  
ACATTACAGTCGAGGAGCTGACTCATGTTCTTACAAGTCTCGGTGAACGTTTGTCTCGAGAAGAA  
GTAGCCGATGTGATACGTGAAGCCGACTCCGATGGCGATGGTGTAATCAACTACGAAGAATTCT  
CTCGTGTCATTTCTTCCAAGTAA

**Figure S1. Nucleotide sequence of NES-FRCaMP protein.**

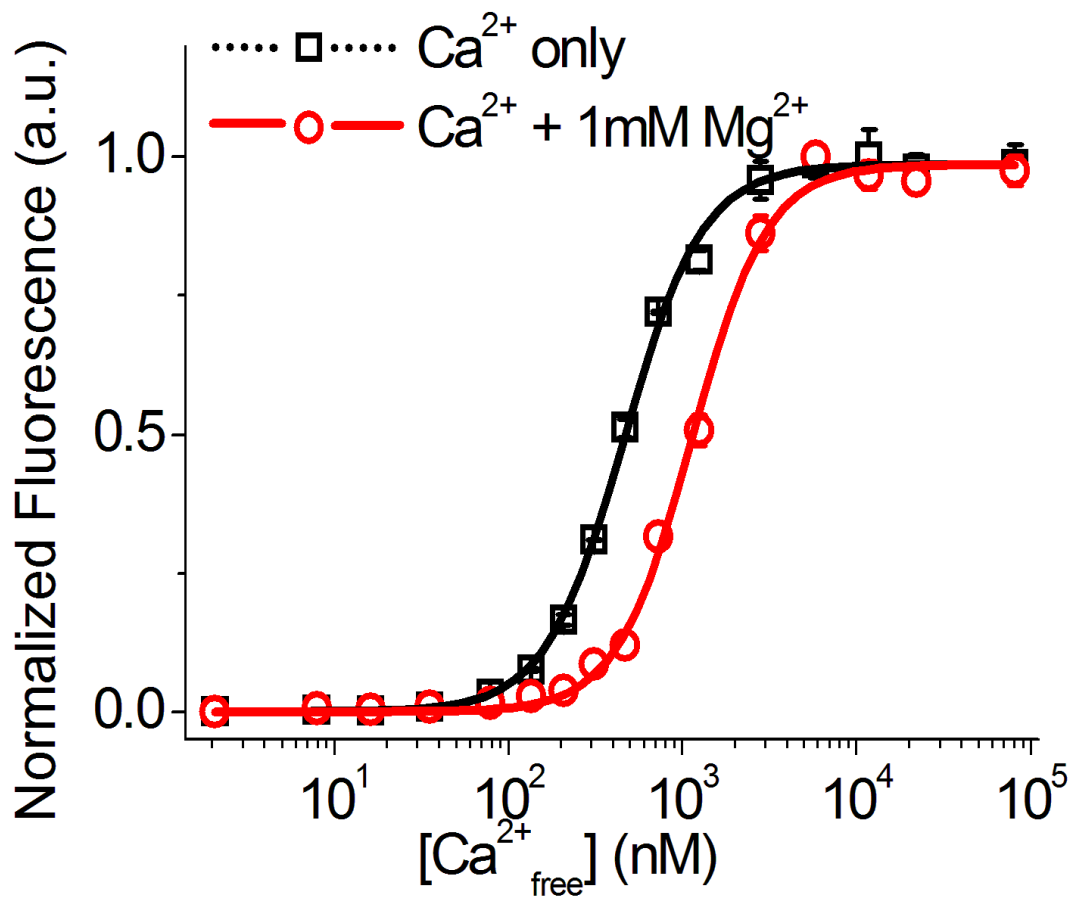

Figure S2. Calcium titration curves for R-GECO1.

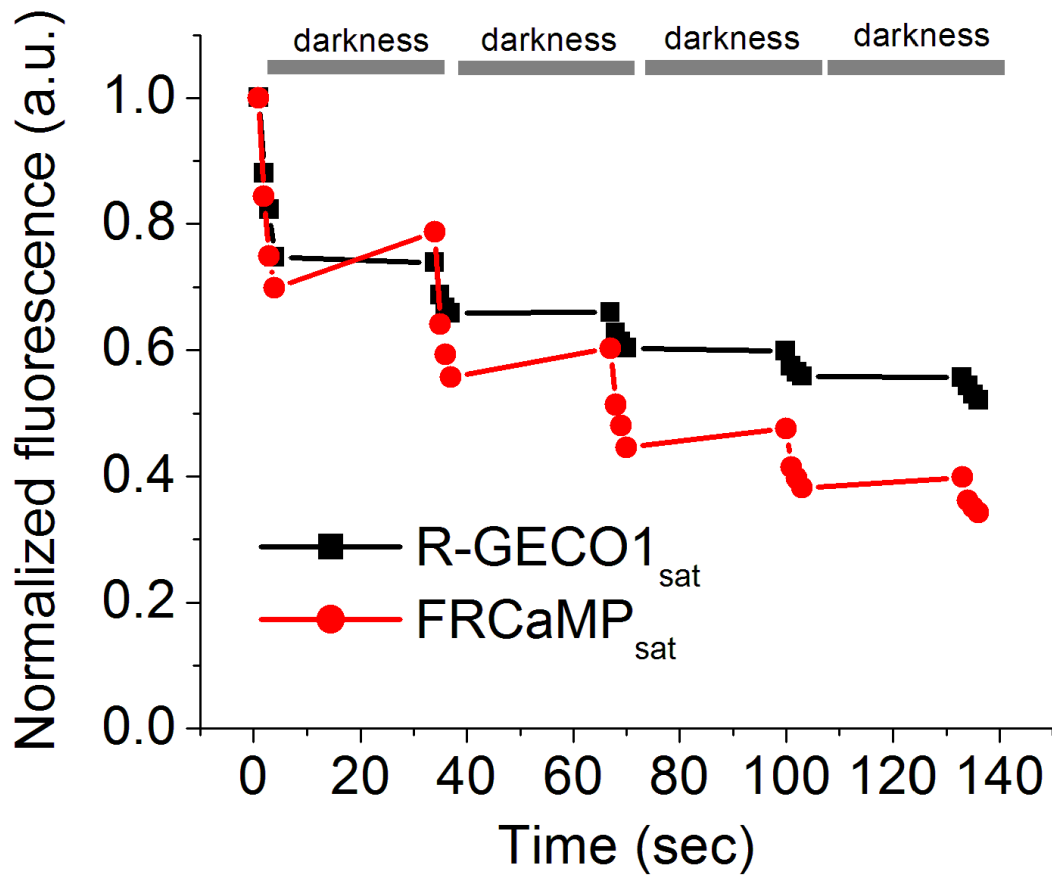

**Figure S3.** Photochromism in the FRCaMP<sub>sat</sub> indicator. 5 cycles of continuous metal halide lamp illumination were composed of photobleaching with yellow light (550/25BP) for 4 seconds followed by 30 seconds of darkness between cycles (marked as grey lines). Data were averaged across 6 drops in oil from 3 fields of view.

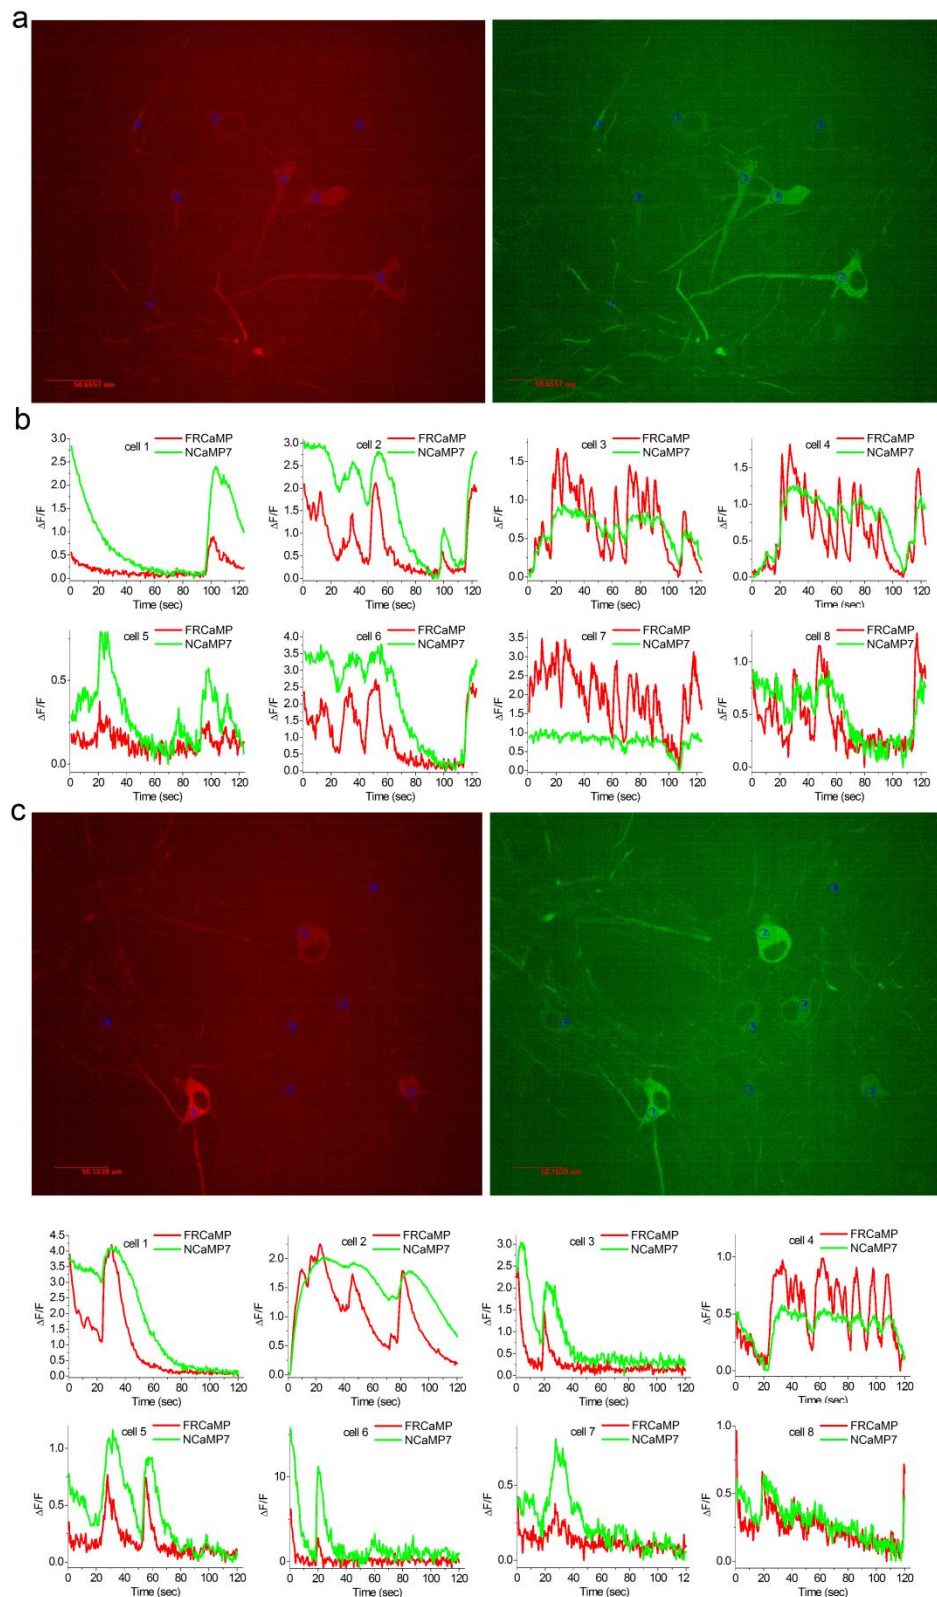

**Figure S4.** Calcium imaging of non-specific (spontaneous) activity of neuronal cultures co-expressing the FRCaMP and NCaMP7 calcium indicators. **(a, c)** Confocal images of two fields of view for neuronal cultures co-expressing the FRCaMP and NCaMP7 indicators. Scale bar, 50  $\mu\text{m}$ . **(b, c)** Examples of  $\Delta F/F$  traces for the 8 cells are shown for each of two fields of view. Neuronal cultures co-expressing the NES-FRCaMP and NES-NCaMP7 indicators were imaged on DIV 15th. Neuronal cultures were transduced on DIV 4th with the mixture of rAAVs carrying NES-FRCaMP and NES-NCaMP7.

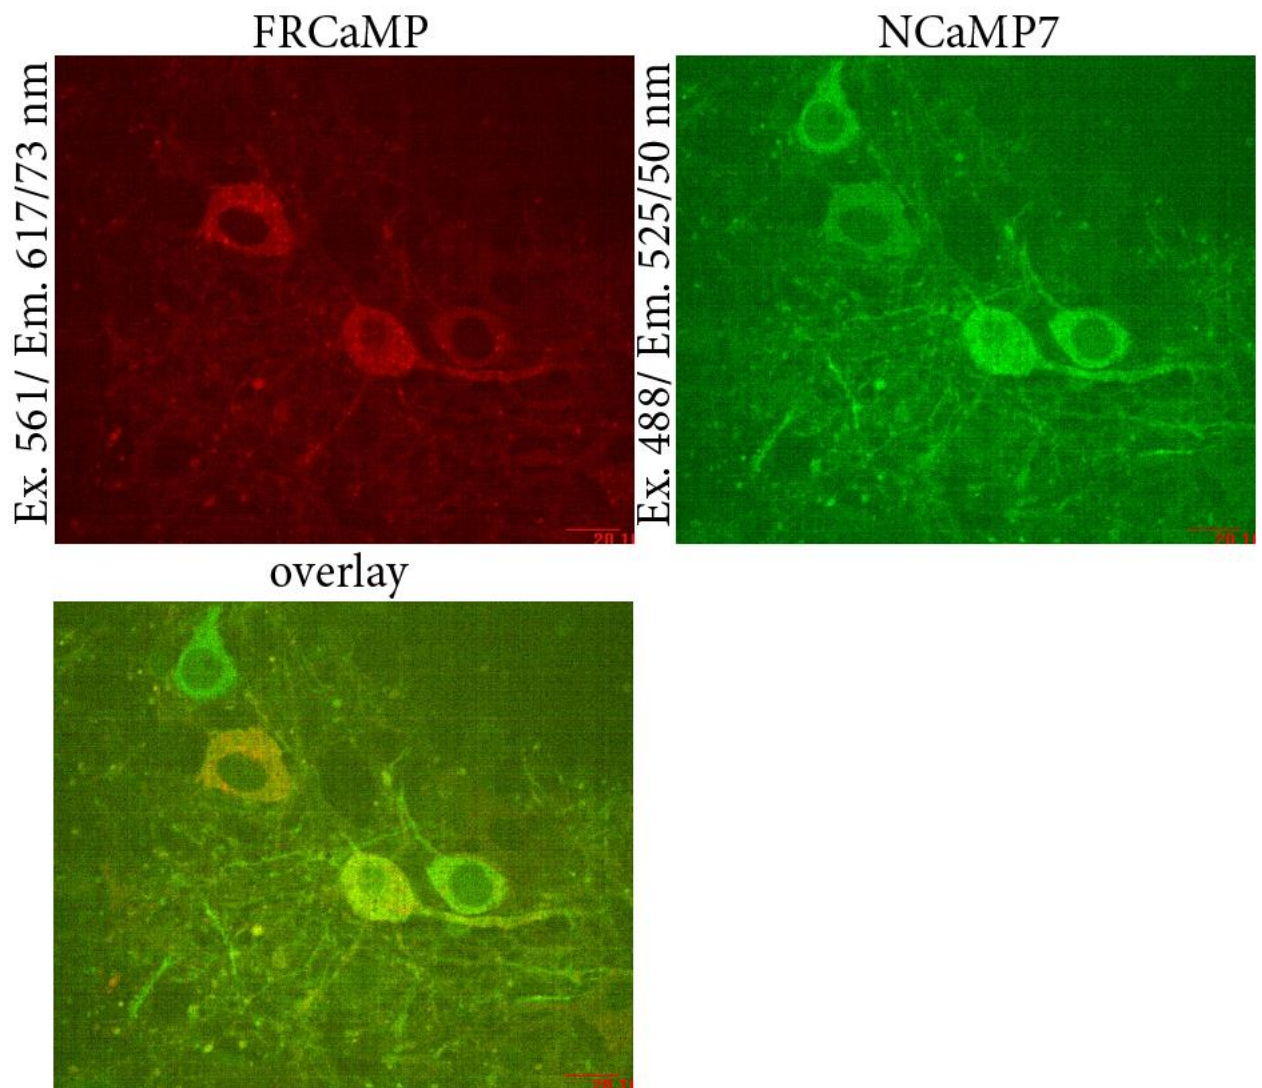

**Figure S5.** Puncta-like localization of the red FRCaMP indicator co-expressing with green NCaMP7 in cultured neurons. Confocal images of neurons co-expressing green NCaMP7 indicator with even distribution and red indicator FRCaMP with uneven puncta-like distribution. Neuronal cultures were imaged on DIV 22th. Scale bar, 20  $\mu\text{m}$ .



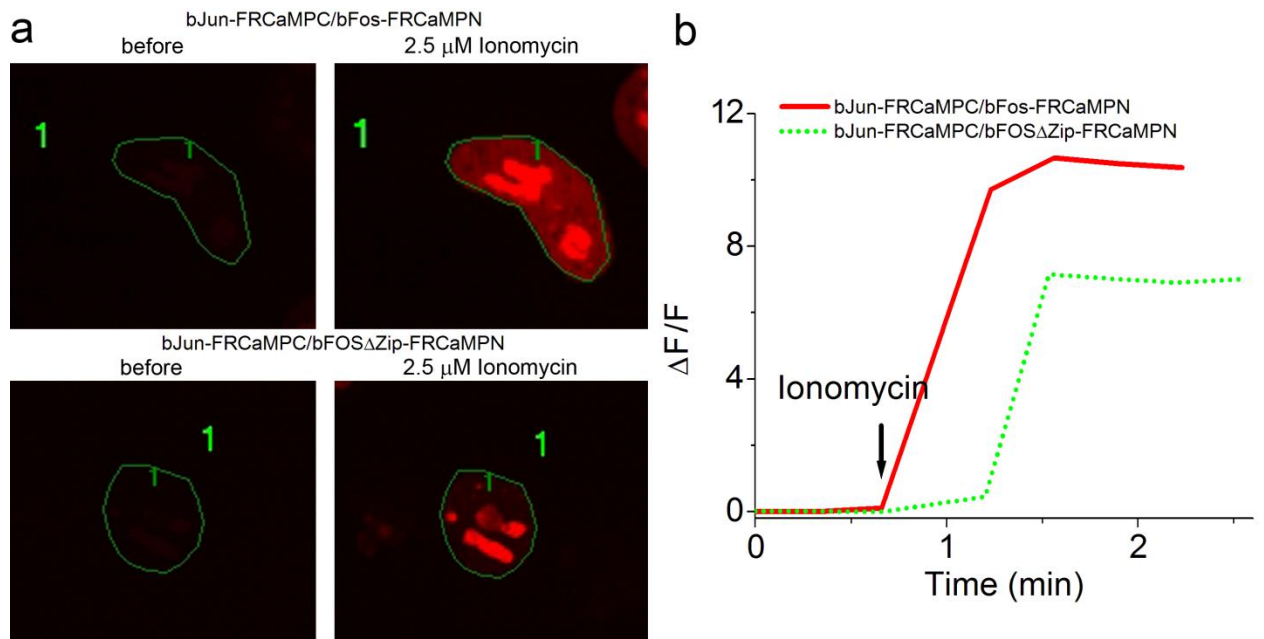

**Figure S6.** Localization and time-lapse response of the split-version of the FRCaMP indicator to  $\text{Ca}^{2+}$  variations in HeLa cells depending on the presence of the heterodimerizing (bJun-FRCaMPC/bFos-FRCaMPN) or non-heterodimerizing (bJun-FRCaMPC/bFOS $\Delta$ Zip-FRCaMPN) pair. **(a)** Zoomed area of the cell selected on Figure 7a. **(b)** The graph illustrates  $\Delta F/F$  changes over time in red fluorescence of the split-version of the FRCaMP indicator in response to the addition of 2.5  $\mu\text{M}$  of ionomycin depending on the presence of the heterodimerizing (bJun-FRCaMPC/bFos-FRCaMPN) or non-heterodimerizing (bJun-FRCaMPC/bFOS $\Delta$ Zip-FRCaMPN) pair. The changes on the graph correspond to the area indicated, as a numbered circle on the panel a, Figure 7 or panel a, Figure S5. Time of ionomycin addition is shown by arrow.

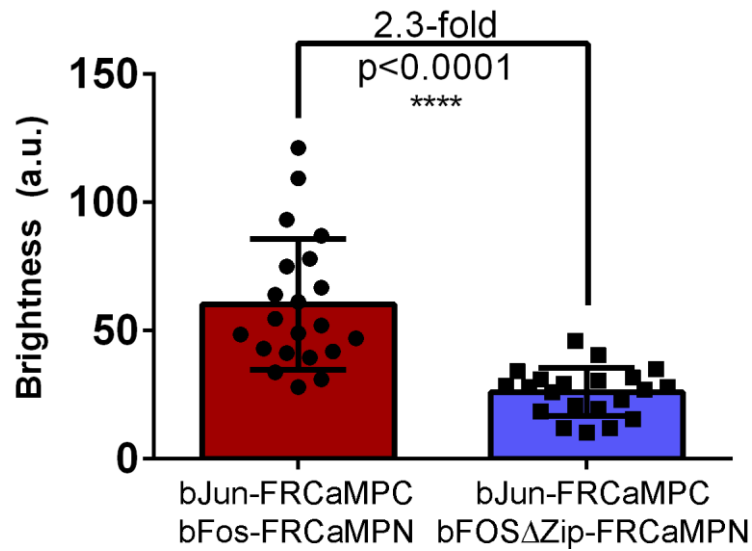

**Figure S7.** Brightness of the split-version of the FRCaMP indicator at low  $\text{Ca}^{2+}$  concentrations in HeLa cells depending on the the presence of the heterodimerizing (bJun-FRCaMPC / bFos-FRCaMPN) or non-heterodimerizing (bJun-FRCaMPC / bFOS $\Delta$ Zip-FRCaMPN) pair. Comparison of the averaged brightness (for the heterodimerizing bJun-FRCaMPC and bFos-FRCaMPN split calcium indicator and its control none-heterodimerizing bJun-FRCaMPC and bFos-FRCaMPN split calcium indicator in HeLa cells at physiological calcium concentration before ionomycin addition. Error bars are standard deviations across twenty one cells (three cultures).  $p$  values show statistical difference between the respective values. \*\*\*\*,  $p$  - value is lower than 0.0001.
